# Supplementary material for: Synthesis and Biological Evaluation of Benzochromenopyrimidinones as Cholinesterase Inhibitors and Potent Antioxidant, Non-Hepatotoxic Agents for Alzheimer’s Disease
Source: Molecules. 2016 May 14;21(5):634. doi: 10.3390/molecules21050634 (PMC6273488; doi:10.3390/molecules21050634)
Supplement: Supplementary file 1 [file molecules-21-00634-s001.pdf]

# Supplementary Materials: Synthesis and Biological Evaluation of Benzochromenopyrimidinones as Cholinesterase Inhibitors, and Potent Antioxidant, Non-Hepatotoxic Agents for Alzheimer's Disease

Youssef Dgachi, Oscar M. Bautista-Aguilera, Mohamed Benchekroun, H  l  ne Martin, Alexandre Bonet, Damijan Knez, Justyna Gody  n, Barbara Malawska, Stanislav Gobec, Mourad Chioua, Jana Janockova, Ondrej Soukup, Fakher Chabchoub, Jos   Marco-Contelles and Lhassane Ismaili

## 1. Inhibition of A  <sub>1-42</sub> Aggregation

Table S1. Inhibition of A  <sub>1-42</sub> aggregation.

| Compound         | Structure                                                                           | Inhibition of A   <sub>1-42</sub> Aggregation at 10   M (%) <sup>a</sup> |
|------------------|-------------------------------------------------------------------------------------|--------------------------------------------------------------------------|
| 3Ab              | 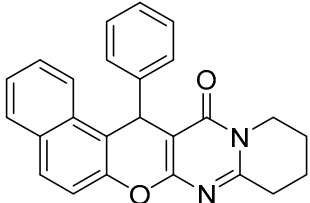   | 13.6    2.1 *                                                            |
| 3Bb              | 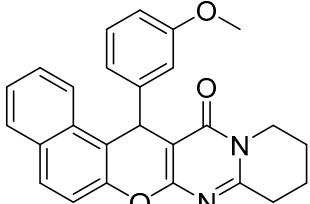  | n.a. <sup>b</sup>                                                        |
| 3Cb <sup>c</sup> | 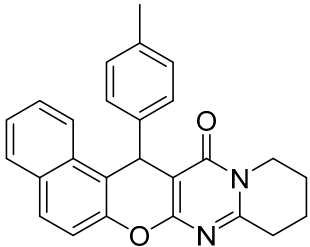 | n.a. <sup>b</sup>                                                        |
| 3Ba              | 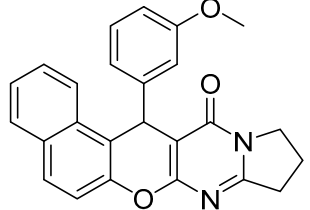 | n.a. <sup>b</sup>                                                        |

<sup>a</sup> Percent of inhibition at 10   M compound and 1.5   M A  <sub>1-42</sub>. Percentage of inhibition is expressed as mean    standard deviation of two independent experiments. \*  $p < 0.05$ , compared to the control (one-way ANOVA, followed by Bonferoni *t*-test). <sup>b</sup> n.a.; inhibition lower than 10%, compound defined as not active. <sup>c</sup> poor solubility in DMSO at 10 mM and 1 mM.

Compound **3Ab** showed weak inhibition of A  <sub>1-42</sub> aggregation, whereas other compound were not active.

## 2. Thioflavin-T (ThT) Fluorometric Assay [1]

Recombinant human 1,1,1,3,3,3-hexafluoro-2-propanol pretreated  $A\beta_{1-42}$  peptide (Merck Millipore, Darmstadt, Germany) was dissolved in DMSO to give 75  $\mu\text{M}$  stock solution. The stock solution was further diluted in HEPES buffered solution (150 mM HEPES, pH 7.4, 150 mM NaCl), to 7.5  $\mu\text{M}$ .  $A\beta_{1-42}$  solution was then added to the test compounds in black-walled 96-well plate, and diluted with ThT solution (final concentration of ThT was 10  $\mu\text{M}$ ). Final mixture contained 1.5  $\mu\text{M}$   $A\beta_{1-42}$ , 10  $\mu\text{M}$  of test compounds, and 3% DMSO. ThT fluorescence was measured every 5 min ( $\lambda_{\text{ex}} = 440 \text{ nm}$ ,  $\lambda_{\text{em}} = 490 \text{ nm}$ ), with the medium continuously shaking between measurements using a 96-well microplate reader (Synergy<sup>TM</sup> H4, BioTek Instruments, Inc., Winooski, VT, USA). The fluorescence intensities at the plateau reached after 24 h in the absence and presence of the test compound were averaged, and the average fluorescence of the corresponding wells at  $t = 15 \text{ min}$  was subtracted. The  $A\beta_{1-42}$  aggregation inhibitory potency is expressed as the percentage inhibition (% inh =  $(1 - F_i/F_0) \times 100\%$ ), where  $F_i$  is the increase in fluorescence of  $A\beta_{1-42}$  treated with the test compound, and  $F_0$  is the increase in fluorescence of  $A\beta_{1-42}$  alone.

## Reference

1. LeVine, H. Thioflavine T interaction with synthetic Alzheimer's disease beta-amyloid peptides: Detection of amyloid aggregation in solution. *Protein Sci. Publ. Protein Soc.* **1993**, *2*, 404–410.
